# Supplementary material for: Global profiling of protein–DNA and protein–nucleosome binding affinities using quantitative mass spectrometry
Source: PubMed Central journal article supplement (PMC5916898; doi:10.1038/s41467-018-04084-0), 2018-04-25
Supplement: 41467_2018_4084_MOESM3_ESM.pdf [file 41467_2018_4084_MOESM3_ESM.pdf]

## Description of Additional Supplementary Files

File Name: Supplementary Data 1

Description:  $K_d^{App}$  values measured in this study. Sheet 1 shows  $K_d^{App}$  values measured for SP/KLF consensus motif experiments including  $IC_{50}$  values from competition experiments. Sheet 2 shows  $K_d^{App}$  values measured for motif survey experiments including with the mycG4 sequence. Sheet 3 shows  $K_d^{App}$  values measured in nucleosome and modified nucleosome experiments. All values are in units of nM.

File Name: Supplementary Data 2

Description: Absolute protein quantification of HeLa nuclear lysate
